# Supplementary material for: Look me in the eyes: constraining gaze in the eye-region provokes abnormally high subcortical activation in autism
Source: PubMed Central journal article supplement (PMC5466661; doi:10.1038/s41598-017-03378-5), 2017-06-09
Supplement: 41598_2017_3378_MOESM1_ESM.pdf [file 41598_2017_3378_MOESM1_ESM.pdf]

1 **Look me in the eyes: constraining gaze in the eye-region provokes abnormally high**  
2 **subcortical activation in autism.**

3  
4 Nouchine Hadjikhani (MD, PhD)<sup>1,2,\*</sup>, Jakob Åsberg Johnels (PhD)<sup>2,3</sup>, Nicole R Zürcher  
5 (PhD)<sup>1</sup>, Amandine Lassalle (PhD)<sup>1,4</sup>, Quentin Guillon (PhD)<sup>5</sup>, Loyse Hippolyte (PhD)<sup>6</sup>, Eva  
6 Billstedt (PhD)<sup>2</sup>, Noreen Ward (MSc)<sup>1</sup>, Eric Lemonnier (MD, PhD)<sup>7</sup>, Christopher Gillberg  
7 (MD, PhD)<sup>2</sup>.

10 **Supplementary Information:**

11 **Results:**

12 Initially, an omnibus 2 (Group: ASD, CON) by 4 (Emotion: Neutral, Happy, Angry, Fear) by 2  
13 (Condition: No Cross, Cross) by 4 (ROI: left amygdala, right amygdala, pulvinar, superior  
14 colliculus) mixed factorial analysis of variance (ANOVA) was performed. The Greenhouse-  
15 Geisser correction was used for correcting against violations against sphericity The full  
16 four-way interaction effect was significant ( $F_{1,6.41} = 2.22, p = 0.038, \eta_p^2 = 0.051$ ). Following  
17 this result, 2 (Group: ASD, CON) by 4 (Emotion: Neutral, Happy, Angry, Fear) by 2  
18 (condition: No Cross, Cross) mixed factorial ANOVAs were performed separately for each  
19 ROI, and followed up by two-tailed planned comparisons between groups for each Emotion  
20 for the CROSS and the NO CROSS conditions separately, as well as within the groups  
21 comparing the CROSS and the NO CROSS conditions for each Emotion.

22 **Superior colliculus:** There was a main effect of Group, where ASD showed more activation  
23 than CON ( $F_{1,41} = 6.606, p = 0.014, \eta_p^2 = 0.139$ ). In addition, there was a trend for a Condition \*  
24 Emotion interaction ( $F_{3,123} = 2.627, p = 0.053, \eta_p^2 = 0.060$ ). Across all Emotions, the effect of  
25 Group was not significant for the NO CROSS condition ( $F_{1,41} = 1.244$ ). It was however very

26 significant for the CROSS condition ( $F_{1,41}=7.543, p=0.009, \eta_p^2 = 0.155$ ). Planned comparisons  
27 show significant higher activation for ASD compared with CON for Neutral ( $p=0.0048$ ),  
28 Happy ( $p=0.0061$ ), and Fear ( $p=0.0069$ ). There was a trend for Angry ( $p=0.085$ ). The effect  
29 of Condition was not significant for ASD ( $F_{1,22}=2.367, p=0.138, \eta_p^2 = 0.097$ ), nor for CON  
30 ( $F_{1,19}=0.662, p=0.426, \eta_p^2 = 0.034$ ). Planned comparison showed a trend for higher  
31 activation for the CROSS condition in ASD for Neutral ( $p=0.092$ ) and for Happy ( $p=0.066$ )  
32 but not for Angry ( $p=0.142$ ) nor for Fear ( $p=0.137$ ). None of the planned comparisons were  
33 significant in the CON group.

34 **Pulvinar:** There was a main Group effect, where ASD showed more activation than CON  
35 ( $F_{1,41}=8.107, p=0.007, \eta_p^2 = 0.165$ ). In addition, there was a significant Condition \* Emotion  
36 interaction ( $F_{3,123}=3.182, p=0.026, \eta_p^2 = 0.072$ ). Across all Emotions, the effect of Group  
37 was very significant for the NO CROSS condition ( $F_{1,41}=9.322, p =0.004, \eta_p^2 = 0.185$ ), and  
38 post-hoc comparisons show significant higher activation for ASD compared with CON for  
39 Neutral ( $p=0.0081$ ), Happy ( $p=0.0080$ ), and Angry ( $p=0.0250$ ) and Fear ( $p=0.0063$ ). One-  
40 way ANOVA was marginally significant for the CROSS condition ( $F_{1,41}=3.854, p=0.056, \eta_p^2 =$   
41  $0.086$ ). Planned comparisons show significant higher activation for ASD compared with  
42 CON only for Fear ( $p=0.0290$ ). The effect of Condition for each Group was not significant for  
43 ASD ( $F_{1,22}=0.792, p=0.383, \eta_p^2 = 0.035$ ). It was significant for CON ( $F_{1,19}=5.398, p=0.031, \eta_p^2$   
44  $= 0.221$ ). Planned comparison showed a trend for higher activation for the CROSS condition  
45 in ASD ( $p=0.089$ ) and was significant in CON ( $p=0.005$ ) for Happy but not for the other  
46 emotions.

47 **Left Amygdala:** There was a main Group effect, where ASD showed more activation than  
48 CON ( $F_{1,41}=5.549, p=0.023, \eta_p^2 = 0.119$ ). There was also a main effect of Condition

49 ( $F_{1,41}=7.219, p=0.010, \eta_p^2 = 0.150$ ), of Emotion ( $F_{3,123}=2.942, p=0.036, \eta_p^2 = 0.067$ ), a  
50 Condition \* Group interaction ( $F_{1,41}=4.878, p=0.033, \eta_p^2 = 0.106$ ) as well as a Condition \*  
51 Emotion interaction ( $F_{3,123}=3.085, p=0.030, \eta_p^2 = 0.070$ ). Across all Emotions, the effect of  
52 Group was not significant for the NO CROSS condition ( $F_{1,41}=0.876$ ). It was however very  
53 significant for the CROSS condition ( $F_{1,41}=8.357, p=0.006, \eta_p^2 = 0.169$ ). Planned  
54 comparisons show significant higher activation for ASD compared with CON for Neutral  
55 ( $p=0.0240$ ), Happy ( $p=0.0118$ ), Angry ( $p=0.0219$ ) and Fear ( $p=0.0026$ ). The effect of  
56 Condition for each Group was significant for ASD ( $F_{1,22}=9.129, p=0.006, \eta_p^2 = 0.293$ ), but  
57 not for CON ( $F_{1,19}=2.293, p=0.146, \eta_p^2 = 0.108$ ). Planned comparison showed higher  
58 activation for the CROSS condition in ASD for Neutral ( $p=0.047$ ), Happy ( $p<0.001$ ), Angry  
59 ( $p=0.023$ ) and Fear ( $p=0.013$ ); there was a trend in CON ( $p=0.058$ ) for Happy but not for  
60 the other emotions

61 **Right Amygdala:** There was a main effect of Group, where ASD showed more activation  
62 than CON ( $F_{1,41}=4.738, p=0.035, \eta_p^2 = 0.104$ ). There was also a main effect of Condition  
63 ( $F_{1,41}=9.903, p=0.003, \eta_p^2 = 0.195$ ), of Emotion ( $F_{3,123}=3.94, p=0.010; \eta_p^2 = 0.088$ ), as well as  
64 a Condition \* Group interaction ( $F_{1,41}=5.617, p=0.023; \eta_p^2 = 0.120$ ). Across all Emotions, the  
65 effect of Group was not significant for the NO CROSS condition ( $F_{1,41}=0.668$ ). It was however  
66 very significant for the CROSS condition ( $F_{1,41}=8.977, p<0.005, \eta_p^2 = 0.180$ ). Planned  
67 comparisons show significant higher activation for ASD compared with CON for Neutral  
68 ( $p=0.0359$ ), Happy ( $p=0.0076$ ), Angry ( $p=0.0217$ ) and Fear ( $p=0.0005$ ). The effect of  
69 Condition for each Group was significant for ASD ( $F_{1,22}=13.076, p=0.002, \eta_p^2 = 0.373$ ), but  
70 not for CON ( $F_{1,19}=0.398, p=0.536, \eta_p^2 = 0.021$ ). Planned comparison showed higher

71 activation for the CROSS condition in ASD for Neutral ( $p=0.027$ ), Happy ( $p<0.001$ ), Angry  
72 ( $p=0.007$ ) and Fear ( $p<0.001$ ); no planned comparison was significant for CON.

73 **Supplementary Table 1** reports the effect of ANOVA for the different conditions in each  
74 structure.

75

76

77 In order to test whether our effect was specific to the face-processing subcortical system,  
78 we also analyzed activation in all the subcortical components of the Harvard-Oxford atlas  
79 outside the fast-processing subcortical pathway, namely, left/right hippocampus, caudate,  
80 putamen, pallidum, and accumbens, respectively. First, we conducted a similar ANOVA as  
81 done with the ROIs where we had an *a priori* hypothesis, namely a 2 (Group: ASD, CON)  
82 by 4 (Emotion: Neutral, Happy, Angry, Fear) by 2 (Condition: No Cross, Cross) by 10 (ROI:  
83 left hippocampus, right hippocampus, left caudate, right caudate, left putamen, right  
84 putamen, left accumbens, right accumbens). The full four-way interaction was not  
85 significant ( $F_{27, 15}=0.5$ ,  $p = 0.94$ ). Yet, we performed further separate ANOVAS between and  
86 within groups for each emotion and each condition.

87 We observed a GROUP effect in the left accumbens ( $F_{1,41}=5.95$ ,  $p=0.019$ ,  $\eta_p^2 = 0.127$ ) and in  
88 the right pallidum ( $F_{1,41}=6.001$ ,  $p=0.019$ ,  $\eta_p^2 = 0.128$ ) but in none of the other 8 ROIs. There  
89 was no effect of CONDITION in any of the ROIs with the exception of the left accumbens  
90 ( $F_{1,41}=9.003$ ,  $p=0.005$ ,  $\eta_p^2 = 0.180$ ) and the right putamen ( $F_{1,41}=6.77$ ,  $p=0.013$ ,  $\eta_p^2 = 0.142$ ).

91 We did not correct for multiple comparisons in the results above. If this is done (80  
92 comparisons in total), none of the results above are close to significant. Neither was there  
93 an effect of EMOTION in any of the areas, of CONDITION \* GROUP, or of EMOTION \* GROUP

94 (uncorrected for multiple comparisons), indicating that our findings were specific to the  
95 subcortical face-processing pathway.

96

97 To test that the effect of the CROSS condition between groups was the most marked for the  
98 FEAR condition, we computed Cohen's d for each ROI. Our results, illustrated in Figure S1

99 indicate that FEAR was the emotion in which constraining gaze in the eye-region had the  
100 strongest effect in subcortical face-processing activation in ASD compared with controls.

101

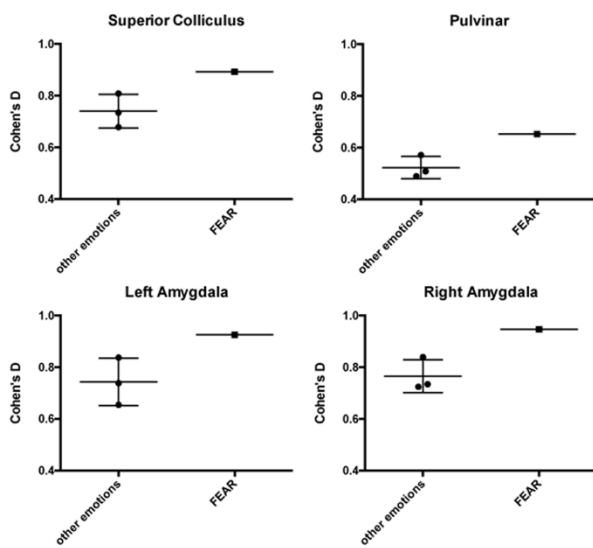

102

103 Supplemental Figure 1 shows Cohen's D values for the comparison between ASD and CON  
104 in the CROSS condition, for FEAR vs. all other emotions.

105

106 We finally tested the hypothesis that autism symptom severity, as measured by AQ, would  
107 be positively correlated with activation in the subcortical system in ASD (n=23, df=21). We  
108 found positive correlations between AQ and subcortical brain activation in the free-viewing  
109 (NO CROSS) condition for FEAR in all subcortical areas and for NEUTRAL in three of the

110 four areas. This positive correlation in the free-viewing condition only may be  
 111 counterintuitive at first glance, seemingly contradicting the findings from the diagnostic  
 112 group comparison. However, we think that it reflects a ceiling level of activation in the  
 113 constrained gaze condition in the diagnosed ASD group. There were no statistically  
 114 significant correlations in any of the areas in the CROSS condition in the ASD group. Details  
 115 of the correlations are given in **Supplementary Table 2**.

116

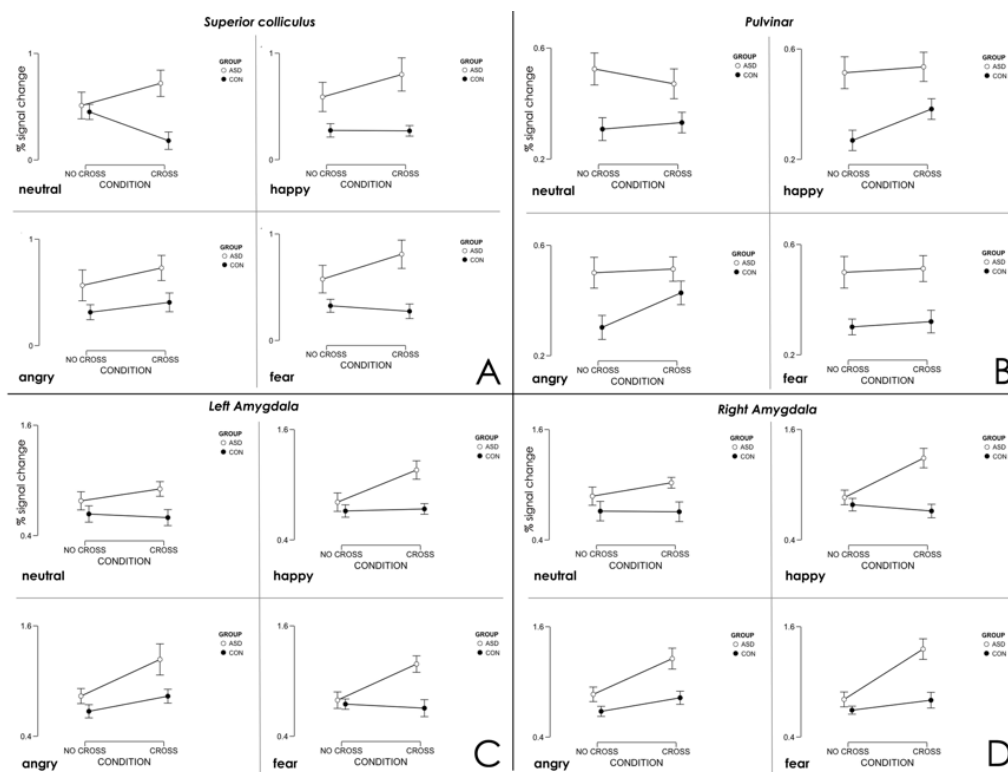

117

118 **Supplemental Figure 2** shows the results expressed in % signal change instead of COPE.

119

120

121

122

123 **Supplementary Videos – stimuli**

124 **Happy.mov:** stimulus used for the happy free-viewing condition (NO CROSS)

125 This video is not covered by the CC BY licence. [Credits to Tottenham et al., 2009]. All rights  
126 reserved, used with permission.  
127

128 **Happy\_cross.mov:** stimulus used for the happy constrained condition (CROSS)

129 This video is not covered by the CC BY licence. [Credits to Tottenham et al., 2009]. All rights  
130 reserved, used with permission.  
131

132 **Angry.mov:** stimulus used for the angry free-viewing condition (NO CROSS)

133 This video is not covered by the CC BY licence. [Credits to Tottenham et al., 2009]. All rights  
134 reserved, used with permission.  
135

136 **Angry\_cross.mov:** stimulus used for the angry constrained condition (CROSS)

137 This video is not covered by the CC BY licence. [Credits to Tottenham et al., 2009]. All rights  
138 reserved, used with permission.  
139

140 **Fear.mov:** stimulus used for the fear free-viewing condition (NO CROSS)

141 This video is not covered by the CC BY licence. [Credits to Tottenham et al., 2009]. All rights  
142 reserved, used with permission.  
143

144 **Fear\_cross.mov:** stimulus used for the fear constrained condition (CROSS)

145 This video is not covered by the CC BY licence. [Credits to Tottenham et al., 2009]. All rights  
146 reserved, used with permission.  
147

148 **Neutral.mov:** stimulus used for the neutral free-viewing condition (NO CROSS)

149 This video is not covered by the CC BY licence. [Credits to Tottenham et al., 2009]. All rights  
150 reserved, used with permission.  
151

152 **Neutral\_cross.mov:** stimulus used for the neutral constrained condition (CROSS)

153 This video is not covered by the CC BY licence. [Credits to Tottenham et al., 2009]. All rights  
154 reserved, used with permission.

155

156

157

158 **Note:** As mentioned, one previous study (Kleinhans *et al.*, 2011) examined subcortical  
159 activation in ASD during fearful face perception, and found results opposite to those  
160 presented here, namely a hypoactivation of the subcortical system. We interpret this  
161 discrepancy, in addition to technical differences (spatial resolution and lower magnetic  
162 field in (Kleinhans *et al.*, 2011)) as differences in study design and experimental paradigm:  
163 while we use dynamic movies with different facial expression, Kleinhans *et al.* (Kleinhans *et*  
164 *al.*, 2011) had static fearful faces very briefly presented (23 ms), and the fixation cross was  
165 only presented between stimuli, and was not located at the level of the eye-region; ASD  
166 participants may therefore not have been attending to the eyes in the stimuli. The fact that  
167 in that study only 54% of ASD participants reported seeing fearful faces as well as the  
168 lower FFA activation observed in ASD supports this interpretation.

#### 169 **References for Supplementary Material:**

170 Kleinhans, N. M., Richards, T., Johnson, L. C., Weaver, K. E., Greenson, J., Dawson, G. & Aylward, E. (2011)  
171 'fMRI evidence of neural abnormalities in the subcortical face processing system in ASD', *Neuroimage*, **54**(1), pp.  
172 697-704.

173 Tottenham, N., Tanaka, J. W., Leon, A. C., McCarry, T., Nurse, M., Hare, T. A., Marcus, D. J., Westerlund, A.,  
174 Casey, B. J. & Nelson, C. (2009) 'The NimStim set of facial expressions: judgments from untrained research  
175 participants', *Psychiatry Res*, **168**(3), pp. 242-249.

176



|                        | superior colliculus                                            | pulvinar                                                       | left amygdala                                                  | right amygdala                                                   |
|------------------------|----------------------------------------------------------------|----------------------------------------------------------------|----------------------------------------------------------------|------------------------------------------------------------------|
| GROUP                  | <b><math>F_{1,41}=6.606, p=0.014, \eta_p^2 = 0.139</math></b>  | <b><math>F_{1,41}=8.107, p=0.007, \eta_p^2 = 0.165</math></b>  | <b><math>F_{1,41}=5.549, p=0.023, \eta_p^2 = 0.119</math></b>  | <b><math>F_{1,41}=4.738, p=0.035, \eta_p^2 = 0.104</math></b>    |
| CONDITION              | $F_{1,41}=0.536, p=0.47, \eta_p^2 = 0.013$                     | $F_{1,41}=1.774, p=0.19, \eta_p^2 = 0.041$                     | <b><math>F_{1,41}=7.219, p=0.01, \eta_p^2 = 0.136</math></b>   | <b><math>F_{1,41}=9.903, p=0.003, \eta_p^2 = 0.175</math></b>    |
| CONDITION*GROUP        | $F_{1,41}=2.430, p=0.127, \eta_p^2 = 0.056$                    | $F_{1,41}=0.102, p=0.75, \eta_p^2 = 0.002$                     | <b><math>F_{1,41}=4.878, p=0.033, \eta_p^2 = 0.072</math></b>  | <b><math>F_{1,41}=5.617, p=0.023, \eta_p^2 = 0.099</math></b>    |
| EMOTION                | $F_{3,123}=0.387, p=0.76, \eta_p^2 = 0.009$                    | $F_{3,123}=0.337, p=0.80, \eta_p^2 = 0.008$                    | <b><math>F_{3,123}=2.945, p=0.036, \eta_p^2 = 0.066</math></b> | <b><math>F_{3,123}=3.940, p=0.010, \eta_p^2 = 0.064</math></b>   |
| EMOTION*GROUP          | $F_{3,123}=1.052, p=0.37, \eta_p^2 = 0.025$                    | $F_{3,123}=0.593, p=0.62, \eta_p^2 = 0.014$                    | $F_{3,123}=0.592, p=0.62, \eta_p^2 = 0.013$                    | $F_{3,123}=0.899, p=0.44, \eta_p^2 = 0.020$                      |
| CONDITION*EMOTION      | <b><math>F_{3,123}=2.627, p=0.053, \eta_p^2 = 0.060</math></b> | <b><math>F_{3,123}=3.182, p=0.026, \eta_p^2 = 0.072</math></b> | <b><math>F_{3,123}=3.085, p=0.030, \eta_p^2 = 0.070</math></b> | $F_{3,123}=1.907, p=0.132, \eta_p^2 = 0.043$                     |
| GROUP effect for CROSS | <b><math>F_{1,41}=7.543, p=0.009, \eta_p^2 = 0.155</math></b>  | <b><math>F_{1,41}=3.854, p=0.056, \eta_p^2 = 0.086</math></b>  | <b><math>F_{1,41}=8.357, p=0.006, \eta_p^2 = 0.169</math></b>  | <b><math>F_{1,41}=8.977, p&lt;0.005, \eta_p^2 = 0.180</math></b> |

Supplementary Table 1: Results of the one-way ANOVA for each structure

|                            | <b>NEUTRAL<br/>NO CROSS</b> | <b>HAPPY<br/>NO CROSS</b> | <b>ANGRY<br/>NO CROSS</b> | <b>FEAR NO<br/>CROSS</b> | <b>NEUTRAL<br/>CROSS</b> | <b>HAPPY<br/>CROSS</b> | <b>ANGRY<br/>CROSS</b> | <b>FEAR<br/>CROSS</b> |
|----------------------------|-----------------------------|---------------------------|---------------------------|--------------------------|--------------------------|------------------------|------------------------|-----------------------|
| <b>Superior colliculus</b> |                             |                           |                           |                          |                          |                        |                        |                       |
| Spearman's rho             | 0.135                       | 0.078                     | 0.104                     | <b>0.38</b>              | 0.24                     | <i>0.325</i>           | 0.178                  | 0.161                 |
| p-value                    | 0.27                        | 0.361                     | 0.318                     | <b>0.037</b>             | 0.135                    | <i>0.065</i>           | 0.208                  | 0.232                 |
| <b>Pulvinar</b>            |                             |                           |                           |                          |                          |                        |                        |                       |
| Spearman's rho             | <b>0.53</b>                 | 0.249                     | 0.235                     | <b>0.424</b>             | 0.227                    | 0.216                  | 0.192                  | 0.195                 |
| p-value                    | <b>0.005</b>                | 0.126                     | 0.14                      | <b>0.022</b>             | 0.149                    | 0.161                  | 0.19                   | 0.186                 |
| <b>Left Amygdala</b>       |                             |                           |                           |                          |                          |                        |                        |                       |
| Spearman's rho             | <b>0.471</b>                | <i>0.342</i>              | <i>0.313</i>              | <b>0.409</b>             | <i>0.309</i>             | 0.15                   | 0.159                  | 0.166                 |
| p-value                    | <b>0.012</b>                | <i>0.055</i>              | <i>0.073</i>              | <b>0.026</b>             | <i>0.076</i>             | 0.248                  | 0.234                  | 0.224                 |
| <b>Right Amygdala</b>      |                             |                           |                           |                          |                          |                        |                        |                       |
| Spearman's rho             | <b>0.352</b>                | 0.056                     | 0.06                      | 0.393                    | <i>0.307</i>             | 0.142                  | 0.168                  | 0.059                 |
| p-value                    | <b>0.05</b>                 | 0.401                     | 0.393                     | <b>0.032</b>             | <i>0.077</i>             | 0.259                  | 0.222                  | 0.395                 |

**Supplementary Table 2:** Positive correlations between AQ and activation in the subcortical system in the ASD group (n=23, df=21). Significant correlations are in bold, and trends are in italics.
